# Supplementary material
Source: MDPI journal article supplement (https://www.mdpi.com/2073-4352/7/7/191)
Supplement: s1 [file s1]

On the importance of Halogen-Halogen interactions in the solid state of fullerene halides: A combined theoretical and crystallographic study.

Antonio Bauzá,1 and Antonio Frontera,1*

1Department of Chemistry Universitat de les Illes Balears, Crta. de Valldemossa km 7.5, 07122 Palma (Baleares), Spain. E-mail: toni.frontera@uib.es;

Fax: +34 971 173426

**Electronic Supplementary Information**

**Cartesian Coordinates**

**5.**

C -2.7439416 -2.2728310 3.8055009

C -3.1366422 -0.8834678 4.3248677

C -2.3656759 0.2350846 3.6787521

C -1.4068418 0.0361834 2.7367873

C -0.8187816 -1.2871771 2.4450699

C -1.3194705 -2.3047052 3.4795237

C -3.6178278 -3.2811950 3.7173413

C -2.3414376 1.6416825 4.1172823

C -0.7053373 1.3526742 2.4450699

C 0.7347566 1.2002690 2.7367873

C 1.5241189 -0.0654971 2.4450699

C 0.6720852 -1.2364524 2.7367873

C 0.9792487 -2.1662777 3.6787521

C -0.2510200 -2.8485857 4.1172823

C 2.3334267 -2.2746779 4.3248677

C 3.3403002 -1.2399076 3.8055009

C 2.6556686 0.0096576 3.4795237

C -1.3361980 2.2950476 3.4795237

C 2.5924576 1.2069032 4.1172823

C 1.3864272 1.9311931 3.6787521

C 0.8032155 3.1581458 4.3248677

C -1.0326844 4.7737283 3.7173413

C 4.6505121 -1.4925332 3.7173413

C -0.5963586 3.5127386 3.8055009

H -0.3852709 5.6098472 3.9805214

H -2.0335657 4.9904189 3.3460145

H 5.3386124 -0.7340899 3.3460145

H 5.0509056 -2.4712692 3.9805214

H -4.6656347 -3.1385780 3.9805214

H -3.3050467 -4.2563290 3.3460145

H 0.7113920 2.9758548 5.4140918

H -2.9328618 -0.8718439 5.4140918

H 2.2214698 -2.1040109 5.4140918

H 3.2367674 1.5280609 4.9342010

H -0.2950442 -3.5671532 4.9342010

H -2.9417233 2.0390924 4.9342010

C 0.5999240 3.5121456 -3.8051667

C -0.7988410 3.1578435 -4.3267718

C -1.3838914 1.9322188 -3.6797567

C -0.7333588 1.2010522 -2.7371674

C 0.7069088 1.3518840 -2.4451549

C 1.3387730 2.2936934 -3.4795448

C 1.0358787 4.7730107 -3.7141281

C -2.5907632 1.2092587 -4.1181031

C -1.5242203 -0.0637410 -2.4451549

C -0.6734623 -1.2356335 -2.7371674

C 0.8173115 -1.2881429 -2.4451549

C 1.4068211 0.0345813 -2.7371674

C 2.3652963 0.2323758 -3.6797567

C 2.3426304 1.6390374 -4.1181031

C 3.1341932 -0.8871052 -4.3267718

C 2.7416453 -2.2756222 -3.8051667

C 1.3170102 -2.3062581 -3.4795448

C -2.6557832 0.0125647 -3.4795448

C 0.2481329 -2.8482961 -4.1181031

C -0.9814048 -2.1645945 -3.6797567

C -2.3353522 -2.2707383 -4.3267718

C -4.6514879 -1.4894081 -3.7141281

C 3.6156091 -3.2836026 -3.7141281

C -3.3415693 -1.2365234 -3.8051667

H -5.0521900 -2.4681177 -3.9769224

H -5.3389148 -0.7312647 -3.3409623

H 3.3027512 -4.2580035 -3.3409623

H 4.6635476 -3.1412660 -3.9769224

H 0.3886424 5.6093837 -3.9769224

H 2.0361636 4.9892682 -3.3409623

H -2.2227510 -2.0972864 -5.4155002

H -0.7049278 2.9736021 -5.4155002

H 2.9276788 -0.8763156 -5.4155002

H 0.2915203 -3.5666233 -4.9352699

H 2.9430262 2.0357756 -4.9352699

H -3.2345465 1.5308477 -4.9352699

F 2.0565539 -0.0728597 1.1398311

F -0.9651786 1.8174578 1.1398311

F 0.9670376 1.8161144 -1.1398405

F -2.0563200 -0.0705781 -1.1398405

F 1.0892824 -1.7455364 -1.1398405

F -1.0913753 -1.7445981 1.1398311

F 2.8191438 -3.5911873 4.1953836

F -2.8218921 -3.5872152 -4.2008796

F 4.5175655 -0.6502227 -4.2008796

F -1.6956734 4.2374379 -4.2008796

F 1.7004875 4.2370438 4.1953836

F -4.5196313 -0.6458565 4.1953836

**6.**

C -2.4634884 2.5793341 4.5496506

C -1.0955015 3.1235127 5.0024374

C 0.0727338 2.3948425 4.4127973

C -0.0589166 1.4037532 3.4919484

C -1.3274497 0.7214967 3.2134663

C -2.3798608 1.1546305 4.2255579

C -3.5872686 3.3053298 4.5246677

C 1.4750538 2.4579251 4.8512940

C 1.2885593 0.7888568 3.2134663

C 1.2451443 -0.6508533 3.4919484

C 0.0388904 -1.5103535 3.2134663

C -1.1862276 -0.7528999 3.4919484

C -2.1103613 -1.1344319 4.4127973

C -2.8661525 0.0484715 4.8512940

C -2.1572906 -2.5104885 5.0024374

C -1.0020247 -3.4231106 4.5496506

C 0.1899910 -2.6383352 4.2255579

C 2.1898698 1.4837047 4.2255579

C 1.3910987 -2.5063966 4.8512940

C 2.0376275 -1.2604106 4.4127973

C 3.2527921 -0.6130242 5.0024374

C 4.6561339 1.4540008 4.5246677

C -1.0688653 -4.7593307 4.5246677

C 3.4655131 0.8437765 4.5496506

H 5.5743203 0.9232940 4.7751137

H 4.7315150 2.4961999 4.2166376

H -0.2039850 -5.3457121 4.2166376

H -1.9875641 -5.2891501 4.7751137

H -3.5867563 4.3658560 4.7751137

H -4.5275300 2.8495123 4.2166376

H 3.1665301 -0.6113120 6.1008647

H -1.0538533 3.0479515 6.1008647

H -2.1126768 -2.4366395 6.1008647

H 1.7627259 -3.1409027 5.6541628

H -3.6014645 0.0438859 5.6541628

H 1.8387386 3.0970168 5.6541628

C 3.4949497 -0.7088748 -4.5506847

C 3.2285160 0.7409787 -4.9969581

C 1.9878032 1.3393744 -4.4094473

C 1.2189778 0.6989502 -3.4895423

C 1.3183920 -0.7379003 -3.2119553

C 2.2454406 -1.3970941 -4.2243533

C 4.7069863 -1.2760985 -4.5357609

C 1.2932012 2.5585847 -4.8491302

C -0.0201556 1.5107111 -3.2119553

C -1.2147976 0.7061907 -3.4895423

C -1.2982364 -0.7728108 -3.2119553

C -0.0041803 -1.4051409 -3.4895423

C 0.1660307 -2.3911753 -4.4094473

C 1.5691987 -2.3992374 -4.8491302

C -0.9725517 -3.1664662 -4.9969581

C -2.3613785 -2.6722779 -4.5506847

C -2.3326393 -1.2460616 -4.2243533

C 0.0871987 2.6431557 -4.2243533

C -2.8623999 -0.1593473 -4.8491302

C -2.1538339 1.0518009 -4.4094473

C -2.2559644 2.4254876 -4.9969581

C -1.2483595 4.7144190 -4.5357609

C -3.4586268 -3.4383205 -4.5357609

C -1.1335713 3.3811527 -4.5506847

H -2.1858895 5.2088713 -4.7887889

H -0.4049212 5.3338415 -4.2331125

H -4.4167817 -3.0175928 -4.2331125

H -3.4180701 -4.4974715 -4.7887889

H 5.6039596 -0.7113998 -4.7887889

H 4.8217028 -2.3162487 -4.2331125

H -2.2163331 2.3550505 -6.0955928

H 3.1477001 0.7418755 -6.0955928

H -0.9313670 -3.0969260 -6.0955928

H -3.5962292 -0.1834048 -5.6528303

H 1.9569478 -3.0227235 -5.6528303

H 1.6392814 3.2061282 -5.6528303

Cl 0.1043246 -2.2003265 1.5015178

Cl -1.9177500 -1.0857903 -1.4998627

Cl 1.8991970 -1.1179250 -1.4998627

Cl 0.0185530 2.2037153 -1.4998627

Cl 1.8533764 1.1905111 1.5015178

Cl -1.9577010 1.0098155 1.5015178

Cl -0.8835077 4.9181632 4.6965166

Cl 4.7010081 -1.6939415 4.6965166

Cl -3.8175004 -3.2242217 4.6965166

Cl -0.6932303 -4.9504321 -4.6786134

Cl -3.9405848 3.0755711 -4.6786134

Cl 4.6338151 1.8748610 -4.6786134

**7.**

C 1.44726110 3.24266580 4.80410970

C 2.55968490 2.21479300 5.06921690

C 2.28391660 0.84206650 4.56651230

C 1.28355080 0.57748620 3.67739460

C 0.17543900 1.49037070 3.43799500

C 0.17304950 2.63080720 4.43250740

C 1.61362610 4.55818120 5.00969640

C 2.86178310 -0.42769380 5.01727460

C 1.20297940 -0.89712000 3.43799500

C -0.14165760 -1.40033070 3.67739460

C -1.37841840 -0.59325070 3.43799500

C -1.14189320 0.82284450 3.67739460

C -1.87120930 1.55689660 4.56651230

C -1.06049780 2.69222380 5.01727460

C -3.19790950 1.10935570 5.06921690

C -3.53186150 -0.36796800 4.80410970

C -2.36487070 -1.16553840 4.43250740

C 2.19182120 -1.46526890 4.43250740

C -1.80128530 -2.26453000 5.01727460

C -0.41270740 -2.39896310 4.56651230

C 0.63822460 -3.32414870 5.06921690

C 3.14068760 -3.67653180 5.00969640

C -4.75431370 -0.88164940 5.00969640

C 2.08460040 -2.87469780 4.80410970

H 3.01619090 -4.71711910 5.31012490

H 4.15264460 -3.31156860 4.83818450

H -4.94422490 -1.94051140 4.83818450

H -5.59324040 -0.25353840 5.31012490

H 2.57704950 4.97065750 5.31012490

H 0.79158020 5.25208000 4.83818450

H 0.51241050 -3.51835760 6.14204780

H 2.79078180 2.20293920 6.14204780

H -3.30319230 1.31541830 6.14204780

H -2.25310630 -2.86408950 5.80545230

H -1.35382110 3.38329200 5.80545230

H 3.60692740 -0.51920260 5.80545230

Br -2.09119910 -0.98171420 1.55831050

Br 0.19541010 2.30188870 1.55831050

Br 1.89578900 -1.32017450 1.55831050

Br 0.22855320 -5.14948360 4.28785600

Br 4.34530700 2.77267470 4.28785600

Br -4.57386020 2.37680890 4.28785600

C 0.80779430 -3.45831250 -4.80463620

C 2.09512100 -2.66009480 -5.06895520

C 2.08394110 -1.25958930 -4.56771770

C 1.15072830 -0.80983790 -3.67984700

C -0.10991300 -1.49629240 -3.44071350

C -0.32814210 -2.61653240 -4.43428370

C 0.72305670 -4.78184990 -5.00805210

C 2.89207410 -0.12185270 -5.01796820

C 1.35078370 0.65295870 -3.44071350

C 0.12597610 1.40147890 -3.67984700

C -1.24087070 0.84333370 -3.44071350

C -1.27670440 -0.59164100 -3.67984700

C -2.13280690 -1.17495130 -4.56771770

C -1.55156460 -2.44368330 -5.01796820

C -3.35127020 -0.48438060 -5.06895520

C -3.39888360 1.02958590 -4.80463620

C -2.10191250 1.59244560 -4.43428370

C 2.43005460 1.02408680 -4.43428370

C -1.34050950 2.56553600 -5.01796820

C 0.04886580 2.43454060 -4.56771770

C 1.25614920 3.14447550 -5.06895520

C 3.77967520 3.01711040 -5.00805210

C -4.50273190 1.76473950 -5.00805210

C 2.59108940 2.42872660 -4.80463620

H 3.85460990 4.06281870 -5.30710640

H 4.70454550 2.46760770 -4.83592780

H -4.48928370 2.84045200 -4.83592780

H -5.44580910 1.30678080 -5.30710640

H 1.59119920 -5.36959940 -5.30710640

H -0.21526180 -5.30805970 -4.83592780

H 1.16985400 3.36116730 -6.14167150

H 2.32592930 -2.69370700 -6.14167150

H -3.49578330 -0.66746030 -6.14167150

H -1.67058320 3.24193530 -5.80458270

H -1.97230680 -3.06773510 -5.80458270

H 3.64288990 -0.17420020 -5.80458270

Br -1.86644350 1.35977470 -1.56095570

Br -0.24437770 -2.29627480 -1.56095570

Br 2.11082110 0.93650010 -1.56095570

Br 1.19981860 5.01290880 -4.28426540

Br 3.74139700 -3.54552780 -4.28426540

Br -4.94121560 -1.46738100 -4.28426540

**8.**

C -2.58450700 2.37347480 5.14788650

C -1.30146860 3.20620590 5.15287860

C -0.06935020 2.48632170 4.76670170

C -0.13291270 1.39980150 3.92882570

C -1.33954870 0.63817220 3.74137760

C -2.43765030 0.98909170 4.70396700

C -3.73033950 2.87512910 5.64757700

C 1.30557170 2.62953590 5.23089650

C 1.22244770 0.84099710 3.74137760

C 1.27872000 -0.58479500 3.92882570

C 0.11710100 -1.47916930 3.74137760

C -1.14580730 -0.81500650 3.92882570

C -2.11854270 -1.30321990 4.76670170

C -2.93003070 -0.18410970 5.23089650

C -2.12592140 -2.73020780 5.15287860

C -0.76323590 -3.42498610 5.14788650

C 0.36224660 -2.60561300 4.70396700

C 2.07540370 1.61652130 4.70396700

C 1.62445900 -2.44542620 5.23089650

C 2.18789280 -1.18310180 4.76670170

C 3.42739000 -0.47599810 5.15287860

C 4.35510460 1.79300420 5.64757700

C -0.62476510 -4.66813330 5.64757700

C 3.34774300 1.05151130 5.14788650

H 5.27121430 1.33089410 6.01685960

H 4.29876060 2.88093000 5.65845380

H 0.34557820 -5.16330090 5.65845380

H -1.48301910 -5.23045260 6.01685960

H -3.78819530 3.89955850 6.01685960

H -4.64433890 2.28237090 5.65845380

H 3.85807440 -0.83622750 6.09178960

H -1.20484300 3.75930410 6.09178960

H -2.65323140 -2.92307670 6.09178960

H 2.07865070 -3.07983870 5.98987350

H -3.70654390 -0.26024490 5.98987350

H 1.62789330 3.34008370 5.98987350

C 3.49845170 -0.26317330 -5.14841950

C 3.22965070 1.24251290 -5.15119500

C 1.86155800 1.64952440 -4.76540790

C 1.11263980 0.86067050 -3.92706810

C 1.38233570 -0.54120810 -3.73878700

C 2.38817440 -1.10228270 -4.70316990

C 4.64643210 -0.75633190 -5.65193120

C 1.02587540 2.75003770 -5.23048370

C -0.22246790 1.46774180 -3.73878700

C -1.30168250 0.53323910 -3.92706810

C -1.15986780 -0.92653370 -3.73878700

C 0.18904260 -1.39390960 -3.92706810

C 0.49775110 -2.43691870 -4.76540790

C 1.86866480 -2.26345310 -5.23048370

C -0.53877760 -3.41821600 -5.15119500

C -1.97714060 -2.89816140 -5.14841950

C -2.14869200 -1.51707830 -4.70316990

C -0.23948230 2.61936100 -4.70316990

C -2.89454030 -0.48658470 -5.23048370

C -2.35930900 0.78739430 -4.76540790

C -2.69087310 2.17570310 -5.15119500

C -1.66821340 4.40209420 -5.65193120

C -2.97821870 -3.64576230 -5.65193120

C -1.52131110 3.16133470 -5.14841950

H -2.63167390 4.75356970 -6.02257650

H -0.83567440 5.10448040 -5.66460400

H -4.00277250 -3.27595550 -5.66460400

H -2.80087520 -4.65588130 -6.02257650

H 5.43254910 -0.09768840 -6.02257650

H 4.83844690 -1.82852500 -5.66460400

H -3.24993640 2.24360360 -6.08905590

H 3.56798590 1.69272570 -6.08905590

H -0.31804950 -3.93632930 -6.08905590

H -3.66636420 -0.58922410 -5.99097260

H 2.34346520 -2.88055240 -5.99097260

H 1.32289900 3.46977660 -5.99097260

I -0.28482950 -5.13372650 -3.68650020

I 4.58835230 2.32019370 -3.68650020

I -4.30352290 2.81353280 -3.68650020

I 2.25539430 -1.03190670 -1.64509800

I -2.02135450 -1.43727540 -1.64509800

I -0.23403970 2.46918210 -1.64509800

I 1.96013310 1.51910860 1.64655750

I 0.33552010 -2.45707940 1.64655750

I 4.99655620 -1.22095390 3.69162480

I -3.55565520 -3.71666760 3.69162480

I -1.44090100 4.93762150 3.69162480

I -2.29565320 0.93797080 1.64655750

**9.**

C -2.7777660 -2.2319789 4.1680602

C -3.1511068 -0.8367366 4.6871503

C -2.3636225 0.2711537 4.0419159

C -1.4061305 0.0573876 3.1017650

C -0.8375071 -1.2736723 2.8111303

C -1.3537509 -2.2853995 3.8427555

C -3.6660906 -3.2275557 4.0791661

C -2.3189116 1.6777070 4.4791884

C -0.6842790 1.3621385 2.8111303

C 0.7527644 1.1890509 3.1017650

C 1.5217861 -0.0884663 2.8111303

C 0.6533661 -1.2464386 3.1017650

C 0.9469852 -2.1825340 4.0419159

C -0.2934810 -2.8470899 4.4791884

C 2.3001886 -2.3105703 4.6871503

C 3.3218334 -1.2896265 4.1680602

C 2.6560895 -0.0296829 3.8427555

C -1.3023386 2.3150825 3.8427555

C 2.6123927 1.1693829 4.4791884

C 1.4166373 1.9113802 4.0419159

C 0.8509183 3.1473069 4.6871503

C -0.9621000 4.7887055 4.0791661

C 4.6281906 -1.5611497 4.0791661

C -0.5440674 3.5216053 4.1680602

H -0.3025355 5.6155797 4.3413092

H -1.9598052 5.0197031 3.7079262

H 5.3270930 -0.8126104 3.7079262

H 5.0145024 -2.5457864 4.3413092

H -4.7119669 -3.0697933 4.3413092

H -3.3672878 -4.2070927 3.7079262

H 0.7570690 2.9670800 5.7765265

H -2.9481012 -0.8278990 5.7765265

H 2.1910321 -2.1391810 5.7765265

H 3.2632294 1.4819418 5.2942018

H -0.3482154 -3.5670104 5.2942018

H -2.9150139 2.0850686 5.2942018

C 0.5457211 3.5243693 -4.2047940

C -0.8878109 3.1888318 -4.6565814

C -1.4290686 1.9227924 -4.0676163

C -0.7547512 1.1857815 -3.1460066

C 0.6770229 1.3517087 -2.8669394

C 1.2920369 2.3077962 -3.8806994

C 1.0526342 4.7626138 -4.1812377

C -2.6148502 1.1726664 -4.5067793

C -1.5091256 -0.0895354 -2.8669394

C -0.6495413 -1.2465245 -3.1460066

C 0.8321027 -1.2621734 -2.8669394

C 1.4042925 0.0607430 -3.1460066

C 2.3797214 0.2762135 -4.0676163

C 2.3229840 1.6781935 -4.5067793

C 3.2055148 -0.8255491 -4.6565814

C 2.7793328 -2.2347930 -4.2047940

C 1.3525917 -2.2728348 -3.8806994

C -2.6446286 -0.0349614 -3.8806994

C 0.2918662 -2.8508599 -4.5067793

C -0.9506528 -2.1990059 -4.0676163

C -2.3177039 -2.3632827 -4.6565814

C -4.6508616 -1.4696989 -4.1812377

C 3.5982274 -3.2929148 -4.1812377

C -3.3250539 -1.2895763 -4.2047940

H -5.1005767 -2.4300390 -4.4319066

H -5.3083476 -0.6572337 -3.8742931

H 3.2233549 -4.2685471 -3.8742931

H 4.6547638 -3.2022095 -4.4319066

H 0.4458129 5.6322485 -4.4319066

H 2.0849927 4.9257807 -3.8742931

H -2.2486165 -2.3143449 -5.7549916

H -0.8799732 3.1045315 -5.7549916

H 3.1285897 -0.7901866 -5.7549916

H 0.3496376 -3.5834515 -5.3099837

H 2.9285412 2.0945209 -5.3099837

H -3.2781789 1.4889307 -5.3099837

F 2.0506758 -0.1050303 1.5022168

F -0.9343790 1.8284525 1.5022168

F -1.1162968 -1.7234222 1.5022168

F 2.7666887 -3.6331308 4.5555089

F 1.7630392 4.2125881 4.5555089

F -4.5297279 -0.5794573 4.5555089

Cl -2.2038755 -0.0805499 -1.1583381

Cl -2.8887499 -4.0785444 -4.3486538

Cl 1.1716960 -1.8683373 -1.1583381

Cl -2.0877481 4.5410030 -4.3486538

Cl 1.0321795 1.9488871 -1.1583381

Cl 4.9764980 -0.4624586 -4.3486538

**10.**

C -2.68145830 -2.34727760 4.24774920

C -3.11508230 -0.96953250 4.76650750

C -2.37381680 0.17098900 4.12303190

C -1.40792090 -0.00221380 3.18279860

C -0.78260650 -1.30796360 2.89374640

C -1.25566130 -2.34029430 3.92534700

C -3.52714200 -3.37889010 4.15361730

C -2.38829050 1.57792910 4.56108530

C -0.74142640 1.33173890 2.89374640

C 0.70204320 1.22040220 3.18279860

C 1.52403300 -0.02377530 2.89374640

C 0.70587770 -1.21818830 3.18279860

C 1.03882760 -2.14128010 4.12303190

C -0.17238150 -2.85728480 4.56108530

C 2.39718090 -2.21297410 4.76650750

C 3.37353120 -1.14857220 4.24774920

C 2.65458490 0.08271260 3.92534700

C -1.39892360 2.25758170 3.92534700

C 2.56067200 1.27935560 4.56108530

C 1.33498920 1.97029110 4.12303190

C 0.71790130 3.18250660 4.76650750

C -1.16263370 4.74403960 4.15361730

C 4.68977570 -1.36514950 4.15361730

C -0.69207290 3.49584980 4.24774920

H -0.53814970 5.59887210 4.41187870

H -2.16908460 4.93156800 3.78156440

H 5.35540550 -0.58730160 3.78156440

H 5.11784030 -2.33338470 4.41187870

H -4.57969060 -3.26548730 4.41187870

H -3.18632090 -4.34426640 3.78156440

H 0.63289970 3.00050290 5.85629480

H -2.91496160 -0.95214420 5.85629480

H 2.28206190 -2.04835870 5.85629480

H 3.19804680 1.61973460 5.37556380

H -0.19629210 -3.57945710 5.37556380

H -3.00175470 1.95972250 5.37556380

C 0.43545160 3.52603850 -4.33662900

C -1.04222960 3.21190740 -4.62205070

C -1.51789100 1.89922010 -4.10925080

C -0.79966470 1.15827490 -3.21694230

C 0.62157600 1.36678980 -2.97450400

C 1.21145050 2.34233130 -3.96995790

C 0.96808550 4.74367020 -4.51893670

C -2.66909410 1.10987870 -4.55893420

C -1.49446260 -0.14509430 -2.97450400

C -0.60326320 -1.27166740 -3.21694230

C 0.87288670 -1.22169540 -2.97450400

C 1.40292790 0.11339250 -3.21694230

C 2.40371840 0.36492210 -4.10925080

C 2.29573020 1.75656400 -4.55893420

C 3.30270820 -0.70335640 -4.62205070

C 2.83591310 -2.14013140 -4.33662900

C 1.42279320 -2.22031250 -3.96995790

C -2.63424360 -0.12201880 -3.96995790

C 0.37336390 -2.86644270 -4.55893420

C -0.88582740 -2.26414220 -4.10925080

C -2.26047860 -2.50855100 -4.62205070

C -4.59218170 -1.53344850 -4.51893670

C 3.62409620 -3.21022180 -4.51893670

C -3.27136470 -1.38590710 -4.33662900

H -5.02385550 -2.48990320 -4.81421990

H -5.27057630 -0.70140690 -4.33335900

H 3.24272430 -4.21374950 -4.33335900

H 4.66824720 -3.10583490 -4.81421990

H 0.35560830 5.59573810 -4.81421990

H 2.02785190 4.91515640 -4.33335900

H -2.24650290 -2.71288340 -5.70065310

H -1.22617450 3.30197030 -5.70065310

H 3.47267740 -0.58908690 -5.70065310

H 0.45064450 -3.61267390 -5.34778520

H 2.90334510 2.19660660 -5.34778520

H -3.35398970 1.41606730 -5.34778520

F 2.05577560 -0.01571080 1.58511610

F -1.01428180 1.78820930 1.58511610

F -1.04149380 -1.77249850 1.58511610

F 2.91928410 -3.51417230 4.63146700

F 1.58372040 4.28526030 4.63146700

F -4.50300450 -0.77108810 4.63146700

Br -2.85091780 -4.30608010 -3.89282820

Br -2.30284440 -0.14001080 -1.09971700

Br 1.03016930 2.06432720 -1.09971700

Br 5.15463370 -0.31592720 -3.89282820

Br 1.27267510 -1.92431640 -1.09971700

Br -2.30371590 4.62200730 -3.89282820

**11.**

C -2.66954580 -2.36119810 4.34688570

C -3.11582240 -0.98527670 4.85982550

C -2.37718430 0.15927270 4.22017130

C -1.40874020 -0.00905660 3.28130740

C -0.77624610 -1.31190480 2.99563190

C -1.24327990 -2.34585860 4.02750500

C -3.50743840 -3.39924390 4.25238110

C -2.39857760 1.56560600 4.65985750

C -0.74801980 1.32820130 2.99563190

C 0.69652680 1.22453310 3.28130740

C 1.52426590 -0.01629650 2.99563190

C 0.71221340 -1.21547650 3.28130740

C 1.05065790 -2.13833840 4.22017130

C -0.15656580 -2.86003220 4.65985750

C 2.41118580 -2.20574300 4.85982550

C 3.37963040 -1.13129540 4.34688570

C 2.65321310 0.09621740 4.02750500

C -1.40993320 2.24964130 4.02750500

C 2.55514340 1.29442620 4.65985750

C 1.32652640 1.97906570 4.22017130

C 0.70463660 3.19101960 4.85982550

C -1.19011240 4.73715270 4.25238110

C 4.69755080 -1.33790880 4.25238110

C -0.71008460 3.49249350 4.34688570

H -0.57080210 5.59707410 4.50615610

H -2.19930870 4.91663220 3.88380450

H 5.35758270 -0.55365890 3.88380450

H 5.13260940 -2.30420790 4.50615610

H -4.56180730 -3.29286620 4.50615610

H -3.15827400 -4.36297330 3.88380450

H 0.62725610 3.01530070 5.95114020

H -2.92495510 -0.96443060 5.95114020

H 2.29769900 -2.05087010 5.95114020

H 3.19200800 1.64018520 5.47242950

H -0.17556190 -3.58445260 5.47242950

H -3.01644600 1.94426740 5.47242950

C 0.42263420 3.48716010 -4.52781520

C -1.09172490 3.27415280 -4.55884620

C -1.55772130 1.92967350 -4.15968410

C -0.80853490 1.15116380 -3.31294220

C 0.60534330 1.35812220 -3.11844640

C 1.20841420 2.33626810 -4.08803980

C 0.97017540 4.62169850 -5.00339250

C -2.69521850 1.14319730 -4.62407510

C -1.47884000 -0.15481850 -3.11844640

C -0.59266970 -1.27579370 -3.31294220

C 0.87349670 -1.20330380 -3.11844640

C 1.40120460 0.12462980 -3.31294220

C 2.45000690 0.38418940 -4.15968410

C 2.33764720 1.76252900 -4.62407510

C 3.38136190 -0.69161490 -4.55884620

C 2.80865210 -2.10959200 -4.52781520

C 1.41906040 -2.21465150 -4.08803980

C -2.62747460 -0.12161660 -4.08803980

C 0.35757130 -2.90572630 -4.62407510

C -0.89228570 -2.31386300 -4.15968410

C -2.28963700 -2.58253790 -4.55884620

C -4.48759600 -1.47065270 -5.00339250

C 3.51742060 -3.15104580 -5.00339250

C -3.23128630 -1.37756810 -4.52781520

H -4.88691590 -2.41677740 -5.37007120

H -5.15490500 -0.60950850 -4.99582150

H 3.10530230 -4.15952440 -4.99582150

H 4.53644860 -3.02380470 -5.37007120

H 0.35046740 5.44058200 -5.37007120

H 2.04960270 4.76903290 -4.99582150

H -2.37113210 -3.10993790 -5.51403530

H -1.50771920 3.60842960 -5.51403530

H 3.87885130 -0.49849170 -5.51403530

H 0.42642990 -3.67583850 -5.39016240

H 2.97015460 2.20721840 -5.39016240

H -3.39658450 1.46862010 -5.39016240

F 2.06227300 -0.00484490 1.68850640

F -1.02694070 1.78840320 1.68850640

F -1.03533230 -1.78355840 1.68850640

F 2.94141360 -3.50232470 4.71250100

F 1.56239530 4.29850120 4.71250100

F -4.50380890 -0.79617660 4.71250100

I -2.99574970 -4.22152860 -3.15578490

I -2.47448330 -0.12030080 -1.03898590

I -2.15807620 4.70515960 -3.15578490

I 1.34142520 -2.08281500 -1.03898590

I 1.13305810 2.20311580 -1.03898590

I 5.15382590 -0.48363100 -3.15578490

**12.**

C 1.23997050 3.32926510 4.69774250

C 2.40739670 2.36946070 4.98036170

C 2.22290190 0.98468220 4.46935730

C 1.24360400 0.65834160 3.57724960

C 0.07955570 1.49869270 3.33608540

C 0.00596180 2.63667900 4.33088940

C 1.32803810 4.65510610 4.88184500

C 2.88027770 -0.24649190 4.91953690

C 1.25812810 -0.81824360 3.33608540

C -0.05166140 -1.40616350 3.57724960

C -1.33768380 -0.68044910 3.33608540

C -1.19194260 0.74782190 3.57724960

C -1.96421080 1.43274840 4.46935730

C -1.22667060 2.61763960 4.91953690

C -3.25571150 0.90013640 4.98036170

C -3.50321340 -0.59078660 4.69774250

C -2.28641190 -1.31317640 4.33088940

C 2.28045010 -1.32350250 4.33088940

C -1.65360710 -2.37114770 4.91953690

C -0.25869110 -2.41743060 4.46935730

C 0.84831480 -3.26959700 4.98036170

C 3.36742110 -3.47766780 4.88184500

C -4.69545920 -1.17743830 4.88184500

C 2.26324290 -2.73847850 4.69774250

H 3.30917180 -4.52553190 5.17687880

H 4.35325510 -3.05202620 4.69815110

H -4.81975980 -2.24401640 4.69815110

H -5.57381150 -0.60306090 5.17687880

H 2.26463970 5.12859280 5.17687880

H 0.46650470 5.29604260 4.69815110

H 0.74052510 -3.44868610 6.05802860

H 2.61638730 2.36565660 6.05802860

H -3.35691230 1.08302960 6.05802860

H -2.06626460 -2.99661980 5.70913070

H -1.56201650 3.28774750 5.70913070

H 3.62828120 -0.29112780 5.70913070

Br -2.02072790 -1.11456740 1.45752850

Br 0.04512030 2.30728540 1.45752850

Br 1.97560760 -1.19271800 1.45752850

Br 0.54281510 -5.13144940 4.24022440

Br 4.17255800 3.03581630 4.24022440

Br -4.71537300 2.09563310 4.24022440

C 0.94542540 -3.43924660 -4.64447230

C 2.11757540 -2.54691340 -5.09438580

C 2.09239920 -1.16947600 -4.50669120

C 1.17385210 -0.77241650 -3.58672970

C -0.06374470 -1.50926540 -3.30935800

C -0.23355630 -2.63470800 -4.32102410

C 0.98887090 -4.77650990 -4.62117080

C 2.86759090 0.00063960 -4.94540360

C 1.33893450 0.69942810 -3.30935800

C 0.08200630 1.40279400 -3.58672970

C -1.27518980 0.80983720 -3.30935800

C -1.25585840 -0.63037750 -3.58672970

C -2.05899550 -1.22733290 -4.50669120

C -1.43324150 -2.48372640 -4.94540360

C -3.26447940 -0.56041740 -5.09438580

C -3.45118760 0.90086090 -4.64447230

C -2.16494590 1.51961970 -4.32102410

C 2.39850220 1.11508830 -4.32102410

C -1.43434940 2.48308680 -4.94540360

C -0.03340370 2.39680890 -4.50669120

C 1.14690400 3.10733080 -5.09438580

C 3.64214340 3.24464230 -4.62117080

C -4.63101440 1.53186760 -4.62117080

C 2.50576220 2.53838570 -4.64447230

H 3.65972410 4.30523660 -4.87064700

H 4.57480110 2.77222230 -4.31508470

H -4.68821550 2.57578290 -4.31508470

H -5.55830630 1.01679570 -4.87064700

H 1.89858220 -5.32203230 -4.87064700

H 0.11341440 -5.34800520 -4.31508470

H 1.10301840 3.03709190 -6.19304480

H 2.07868950 -2.47378790 -6.19304480

H -3.18170790 -0.56330390 -6.19304480

H -1.78757820 3.12915990 -5.74732840

H -1.81614290 -3.11266800 -5.74732840

H 3.60372110 -0.01649190 -5.74732840

Cl -0.14263400 -2.20001440 -1.59718880

Cl -1.83395140 1.22353190 -1.59718880

Cl -4.72964970 -1.61602600 -4.78048060

Cl 1.97658540 0.97648250 -1.59718880

Cl 0.96530530 4.90400980 -4.78048060

Cl 3.76434440 -3.28798380 -4.78048060

**13.**

C 2.49188660 2.55204700 4.77157980

C 3.08978570 1.20396100 5.21665070

C 2.39842680 0.01031440 4.63248140

C 1.40209920 0.10746450 3.71257600

C 0.67515760 1.35142650 3.43766010

C 1.07068880 2.41805210 4.44898810

C 3.17484100 3.70286380 4.74968010

C 2.50981610 -1.38824050 5.07228500

C 0.83279090 -1.26041690 3.43766010

C -0.60798260 -1.26798580 3.71257600

C -1.50794850 -0.09100960 3.43766010

C -0.79411660 1.16052130 3.71257600

C -1.20814590 2.07194140 4.63248140

C -0.05265650 2.86768470 5.07228500

C -2.58755370 2.07385240 5.21665070

C -3.45608080 0.88201360 4.77157980

C -2.62943890 -0.28178230 4.44898810

C 1.55875010 -2.13626980 4.44898810

C -2.45715960 -1.47944420 5.07228500

C -1.19028090 -2.08225570 4.63248140

C -0.50223210 -3.27781340 5.21665070

C 1.61935360 -4.60092490 4.74968010

C -4.79419460 0.89806100 4.74968010

C 0.96419420 -3.43406060 4.77157980

H 1.12302270 -5.53879400 4.99730080

H 2.66479540 -4.63627060 4.44571590

H -5.34752580 0.01035480 4.44571590

H -5.35824760 1.79683080 4.99730080

H 4.23522500 3.74196310 4.99730080

H 2.68273040 4.62591580 4.44571590

H -0.51128410 -3.20204380 6.31549780

H 3.02869330 1.15823690 6.31549780

H -2.51740920 2.04380690 6.31549780

H -3.07916820 -1.87424230 5.87367860

H -0.08355740 3.60375900 5.87367860

H 3.16272560 -1.72951670 5.87367860

C -0.46723230 -3.47957620 -4.91984340

C 1.05060800 -3.29161570 -4.93860560

C 1.53530770 -1.95186460 -4.54389360

C 0.79417430 -1.16110720 -3.70111300

C -0.62172120 -1.34991100 -3.50939650

C -1.23880900 -2.32034400 -4.47747300

C -1.02861890 -4.60241800 -5.40739300

C 2.68275530 -1.18051520 -5.00887890

C 1.47991780 0.13652910 -3.50939650

C 0.60846120 1.26832870 -3.70111300

C -0.85819660 1.21338190 -3.50939650

C -1.40263550 -0.10722150 -3.70111300

C -2.45801820 -0.35368320 -4.54389360

C -2.36373380 -1.73307660 -5.00887890

C -3.37592690 0.73595460 -4.93860560

C -2.77978530 2.14442310 -4.91984340

C -1.39007230 2.23301210 -4.47747300

C 2.62888130 0.08733190 -4.47747300

C -0.31902150 2.91359180 -5.00887890

C 0.92271050 2.30554780 -4.54389360

C 2.32531880 2.55566110 -4.93860560

C 4.50012040 1.41039890 -5.40739300

C -3.47150150 3.19201910 -5.40739300

C 3.24701750 1.33515310 -4.91984340

H 4.91023890 2.35118000 -5.77591100

H 5.15432210 0.53923500 -5.40869940

H -3.04415220 4.19415640 -5.40869940

H -4.49130100 3.07680160 -5.77591100

H -0.41893790 -5.42798160 -5.77591100

H -2.11016990 -4.73339140 -5.40869940

H 2.41762940 3.09293270 -5.88761300

H 1.46974360 -3.64019480 -5.88761300

H -3.88737300 0.54726210 -5.88761300

H -0.37691170 3.68671070 -5.77280000

H -3.00432930 -2.16977040 -5.77280000

H 3.38124100 -1.51694030 -5.77280000

I -1.15412650 -2.19292420 -1.42446170

I -1.32206480 2.09596500 -1.42446170

I 2.47619140 0.09695920 -1.42446170

I -5.13097490 0.56505770 -3.51095230

I 2.07613310 -4.72608340 -3.51095230

I 3.05484170 4.16102580 -3.51095230

Cl -1.52819240 -4.76083050 4.88857000

Cl -3.35890400 3.70386870 4.88857000

Cl -2.20081040 -0.18257310 1.72437010

Cl 1.25851810 -1.81467120 1.72437010

Cl 0.94229230 1.99724430 1.72437010

Cl 4.88709640 1.05696180 4.88857000

**14.**

C 1.24595670 3.32374480 4.93877110

C 2.42538000 2.36979310 5.19038290

C 2.23170490 0.98100510 4.69481270

C 1.24572880 0.65461750 3.80958550

C 0.08418240 1.49691290 3.57352330

C 0.01170830 2.63620600 4.56532570

C 1.32929130 4.64532390 5.15679890

C 2.88608710 -0.25075770 5.14608870

C 1.25427340 -0.82136050 3.57352330

C -0.05594900 -1.40614160 3.80958550

C -1.33845580 -0.67555240 3.57352330

C -1.18977980 0.75152400 3.80958550

C -1.96542780 1.44221060 4.69481270

C -1.22588100 2.62480360 5.14608870

C -3.26499100 0.91554410 5.19038290

C -3.50142580 -0.58284230 4.93877110

C -2.28887550 -1.30796330 4.56532570

C 2.27716720 -1.32824260 4.56532570

C -1.66020610 -2.37404590 5.14608870

C -0.26627710 -2.42321570 4.69481270

C 0.83961100 -3.28533720 5.19038290

C 3.35832290 -3.47386200 5.15679890

C -4.68761420 -1.17146190 5.15679890

C 2.25546910 -2.74090250 4.93877110

H 3.29656590 -4.51966830 5.45858240

H 4.34717090 -3.04669590 4.99400330

H -4.81210150 -2.24141250 4.99400330

H -5.56243050 -0.59507570 5.45858240

H 2.26586460 5.11474400 5.45858240

H 0.46493060 5.28810840 4.99400330

H 0.72191260 -3.50529330 6.25904140

H 2.67471680 2.37784130 6.25904140

H -3.39662930 1.12745200 6.25904140

H -2.07498920 -3.00252880 5.93215410

H -1.56277160 3.29825770 5.93215410

H 3.63776080 -0.29572900 5.93215410

Br -2.02780520 -1.11051610 1.68977410

Br 0.05216740 2.31138890 1.68977410

Br 1.97563780 -1.20087270 1.68977410

Br 0.55154850 -5.11973770 4.37528610

Br 4.15804860 3.03752380 4.37528610

Br -4.70959710 2.08221390 4.37528610

C 0.98238800 -3.36982870 -5.02766270

C 2.29467790 -2.58428210 -5.04413560

C 2.19541450 -1.16297910 -4.65005800

C 1.19598370 -0.73984140 -3.80890730

C -0.02173680 -1.48471770 -3.61849830

C -0.19281830 -2.62344790 -4.58414490

C 0.92383490 -4.62260620 -5.51858320

C 2.93320060 0.00684340 -5.11378230

C 1.29667160 0.72353420 -3.61849830

C 0.04272960 1.40567290 -3.80890730

C -1.27493480 0.76118350 -3.61849830

C -1.23871330 -0.66583150 -3.80890730

C -2.10487670 -1.31979520 -4.65005800

C -1.46067370 -2.54364790 -5.11378230

C -3.38539290 -0.69510840 -5.04413560

C -3.40955130 0.83414140 -5.02766270

C -2.17556340 1.47870950 -4.58414490

C 2.36838170 1.14473840 -4.58414490

C -1.47252680 2.53680450 -5.11378230

C -0.09053790 2.48277430 -4.65005800

C 1.09071490 3.27939040 -5.04413560

C 3.54137700 3.11136760 -5.51858320

C -4.46521190 1.51123860 -5.51858320

C 2.42716330 2.53568730 -5.02766270

H 3.53450300 4.13722150 -5.88832950

H 4.49258180 2.58013140 -5.52123270

H -4.48075020 2.60062420 -5.52123270

H -5.35019040 0.99235870 -5.88832950

H 1.81568740 -5.12958010 -5.88832950

H -0.01183150 -5.18075570 -5.52123270

H 0.95761480 3.81038130 -5.99139620

H 2.82107960 -2.73450940 -5.99139620

H -3.77869440 -1.07587190 -5.99139620

H -1.83953410 3.22243860 -5.87545620

H -1.87094660 -3.20430260 -5.87545620

H 3.71048080 -0.01813600 -5.87545620

I -0.16827110 -2.47309270 -1.53052510

I -2.05762550 1.38227340 -1.53052510

I 2.22589660 1.09081930 -1.53052510

I -4.91802260 -1.55914680 -3.61141840

I 3.80927210 -3.47955910 -3.61141840

I 1.10875050 5.03870600 -3.61141840

**CCDC Codes**

Fluorinated C60s: EBUFAI, GUMWIV, GUMWOB, IGOKEU, MEBBOK, SUKJOY, UKAHIX, UKAHOD, UKAHUJ, UKAJAR, UKAJEV, WUXNIM, XAFLIZ, XOWDUI.

Chlorinated C60s: AGATUY, ELOWUY, FECMON, FECMUW, FECNAD, FIKGUC, FIKHAJ, REGQUQ, REGRAX, XAKCIW, XIRSIB.

Brominated C60s: JUHJIF, UKAJOF, UKAJUL, UKAKEW, YAYNOC, YAYPAQ, YAYPEU.
